# Supplementary material for: Distinct parameters of the basophil activation test reflect the severity and threshold of allergic reactions to peanut
Source: PubMed Central journal article supplement (PMC4282725; doi:10.1016/j.jaci.2014.09.001), 2015-01
Supplement: mmc2.pdf [file mmc2.pdf]

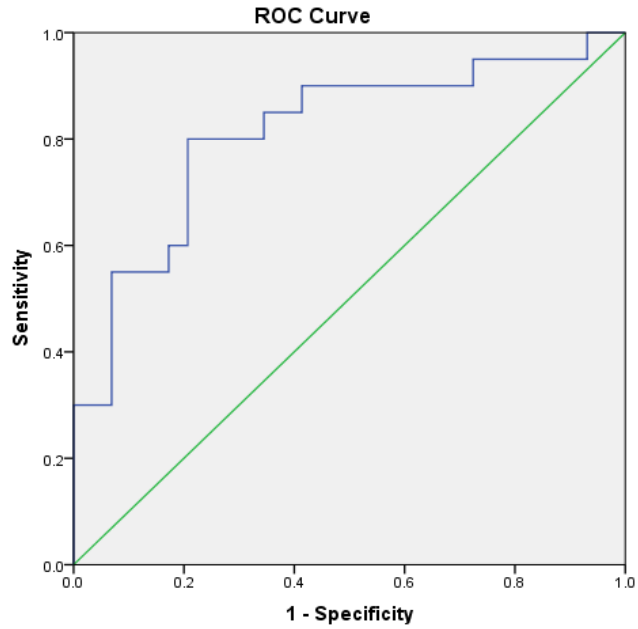

| <b>Cut-offs for CD63 peanut/anti-IgE</b> | <b>Sensitivity (95% CI)</b> | <b>Specificity (95% CI)</b> | <b>Positive predictive value (95% CI)</b> | <b>Negative predictive value (95% CI)</b> |
|------------------------------------------|-----------------------------|-----------------------------|-------------------------------------------|-------------------------------------------|
| > 0.60                                   | 90.0<br>(68.3; 98.8)        | 58.6<br>(38.9; 76.5)        | 60.0<br>(40.6; 77.3)                      | 89.5<br>(66.96; 98.7)                     |
| > 0.87                                   | 80.0<br>(56.3; 94.3)        | 79.3<br>(60.3; 92.0)        | 72.7<br>(49.8; 89.3)                      | 85.2<br>(66.3; 95.8)                      |
| > 1.42                                   | 30.0<br>(11.9; 54.3)        | 96.6<br>(82.2; 99.9)        | 85.7<br>(42.1; 99.6)                      | 66.7<br>(50.5; 80.4)                      |
