# Supplementary material for: Distinct parameters of the basophil activation test reflect the severity and threshold of allergic reactions to peanut
Source: PubMed Central journal article supplement (PMC4282725; doi:10.1016/j.jaci.2014.09.001), 2015-01
Supplement: mmc3.pdf [file mmc3.pdf]

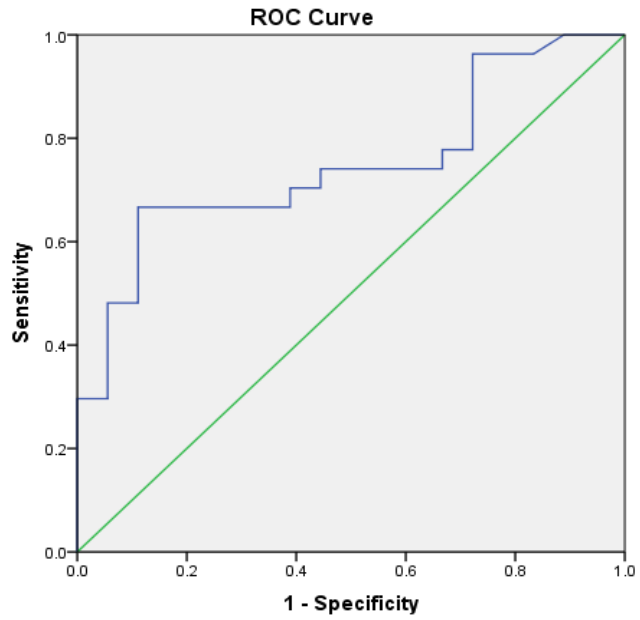

| Cut-offs for CD-sens | Sensitivity<br>(95% CI) | Specificity<br>(95% CI) | Positive<br>predictive value<br>(95% CI) | Negative<br>predictive value<br>(95% CI) |
|----------------------|-------------------------|-------------------------|------------------------------------------|------------------------------------------|
| > 0.9                | 96.3<br>(81.0; 99.9)    | 27.8<br>(9.1; 53.5)     | 66.7<br>(49.8; 80.9)                     | 83.3<br>(35.9; 99.6)                     |
| > 16.5               | 66.7<br>(46.0; 83.5)    | 88.9<br>(65.3; 98.6)    | 90.0<br>(68.3; 98.8)                     | 64.0<br>(42.5; 82.0)                     |
| > 104.7              | 29.6<br>(13.8; 52.2)    | 100.0<br>(81.5; 100.0)  | 100.0<br>(63.1; 100.0)                   | 48.6<br>(31.9; 65.6)                     |
